# Supplementary material
Source: publisher figshare collection journal article supplement (https://frontiersin.figshare.com/ndownloader/files/26063225)

## Appendix File S6. Sensitivity analyses on total stroke.

**Figure A.** Summary forest plot for sensitivity analysis on total stroke by year (excluding trials published before 2000)

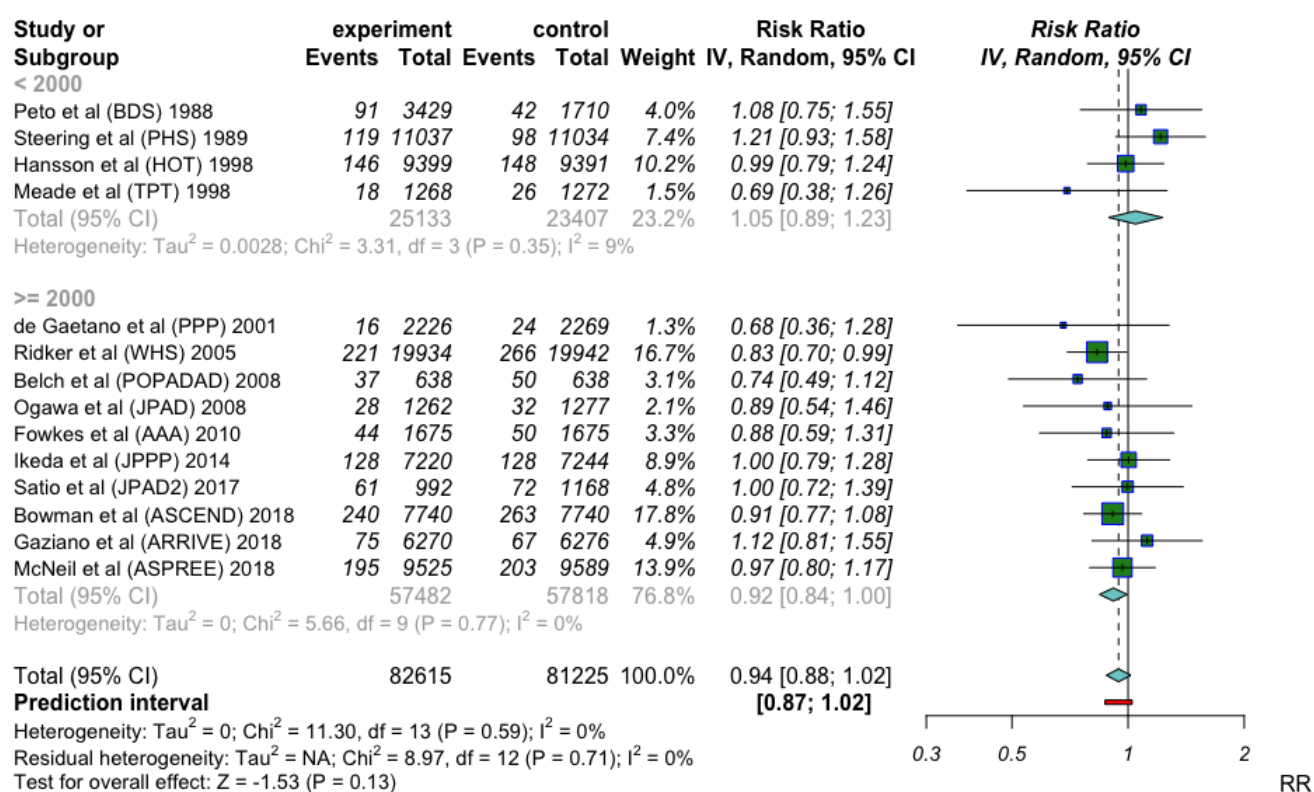

**Figure B.** Summary forest plot for sensitivity analysis on total stroke by blinding (excluding open-label trials)

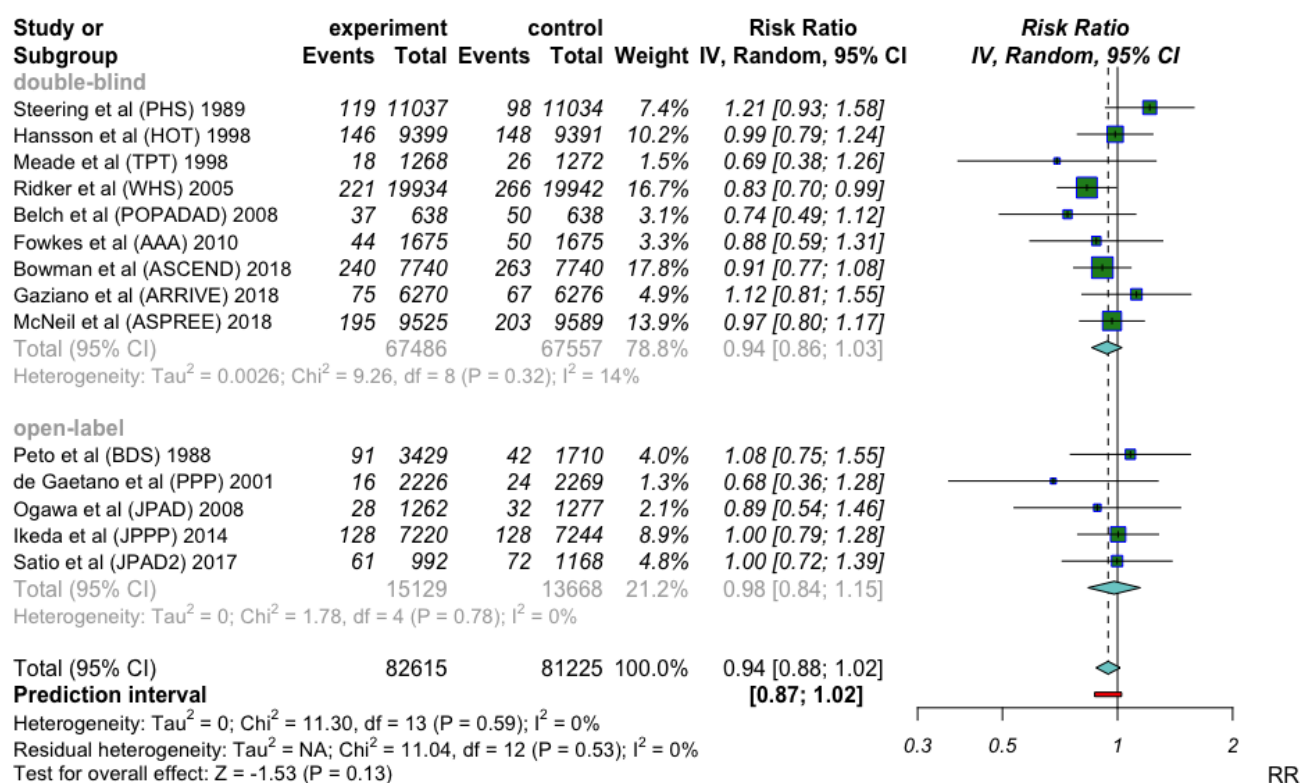

**Figure C.** Summary forest plot for sensitivity analysis on total stroke by study quality (excluding high risk trials)

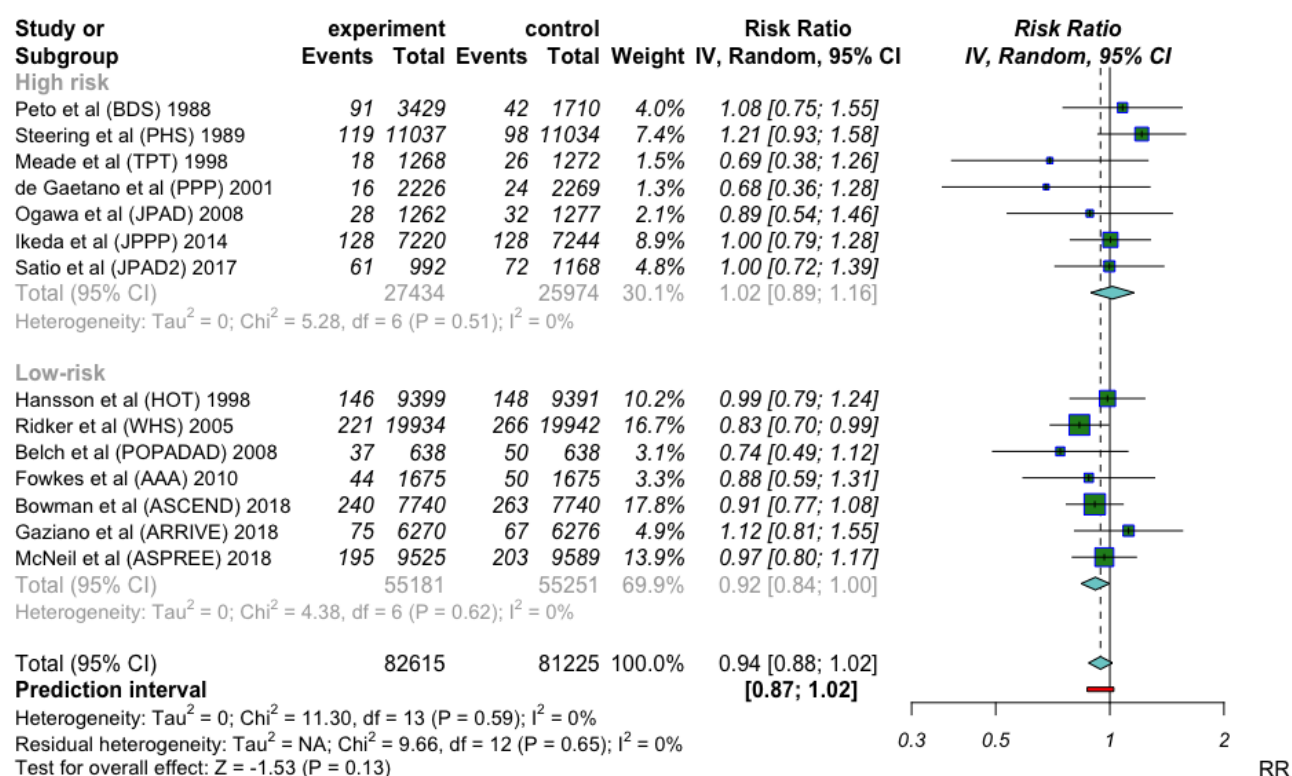

**Figure D.** Summary forest plot for sensitivity analysis on total stroke by asymptomatic PAD (excluding asymptomatic PAD trials)

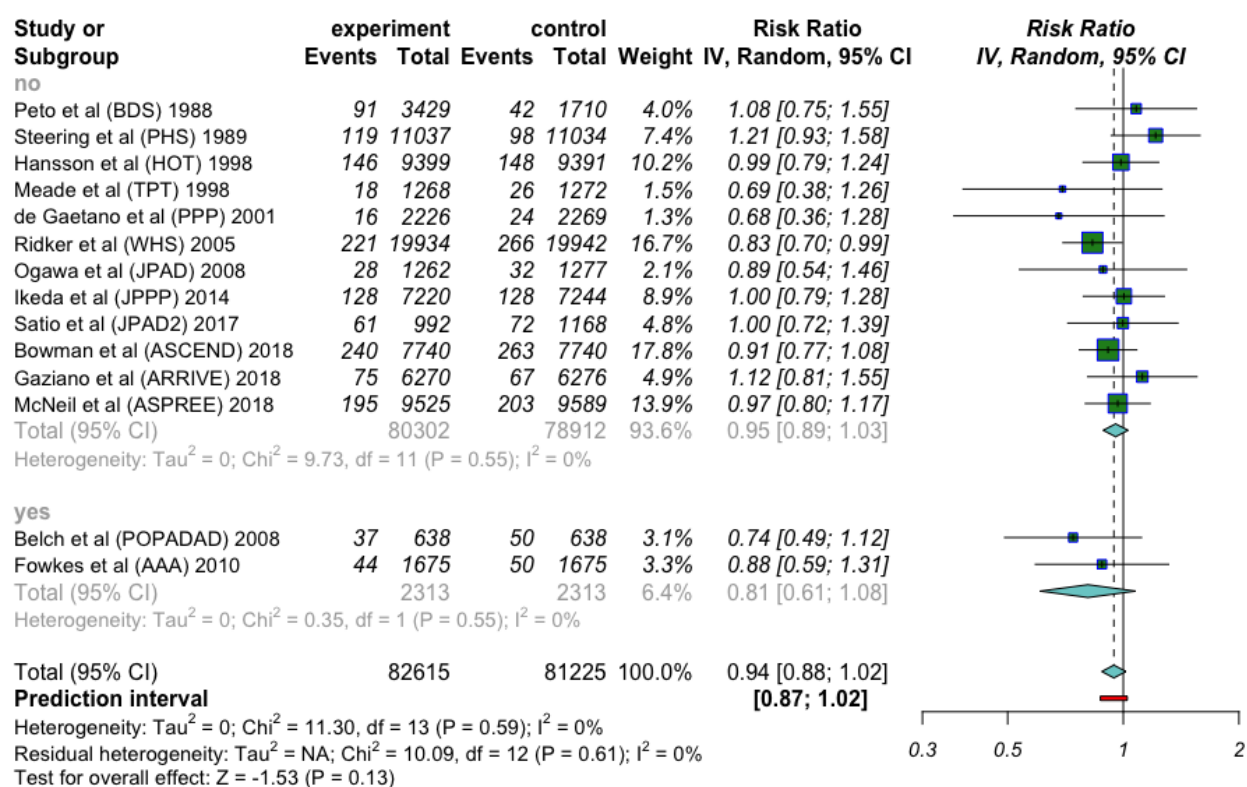

RR

**Figure E.** Summary forest plot for sensitivity analysis on total stroke by male populations (excluding 100% male individual trials)

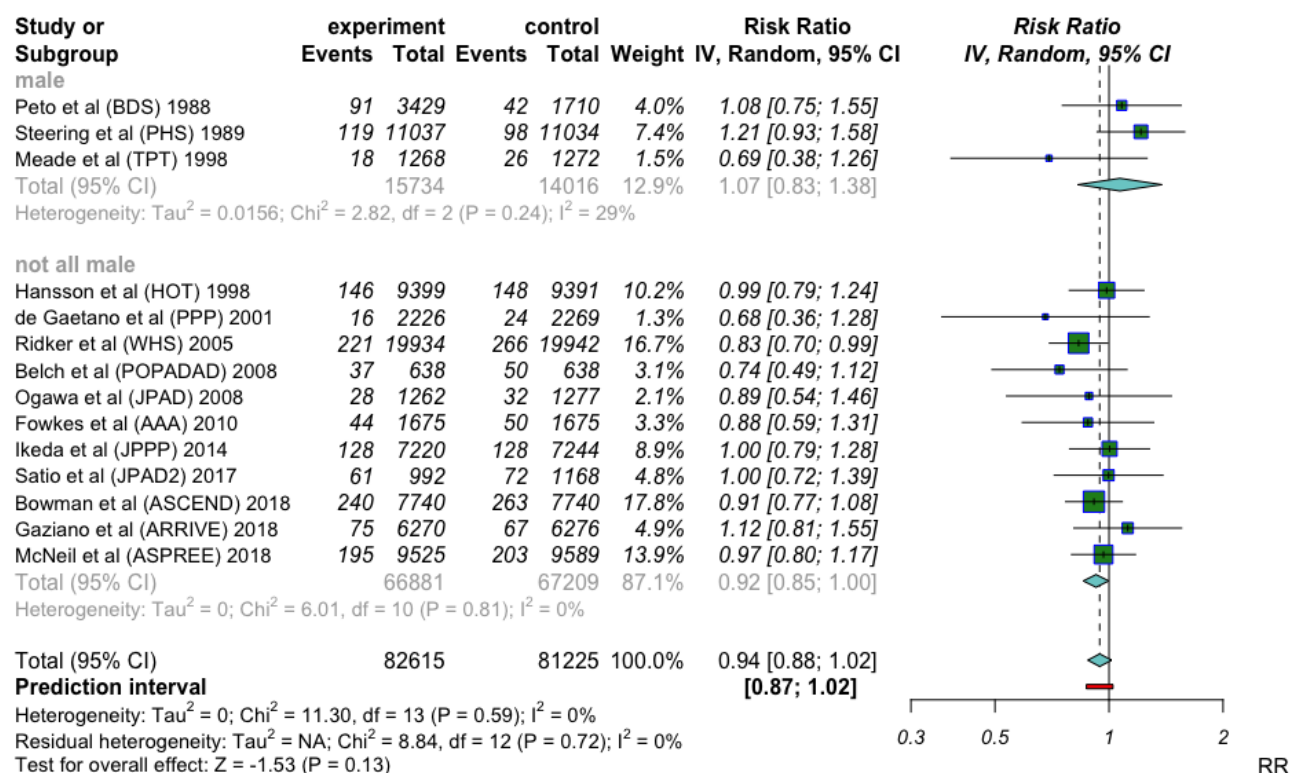

**Figure F.** Summary forest plot for sensitivity analysis on total stroke by diabetes status (excluding 100% diabetic individual trials and restricted on 100% diabetic individual trials)

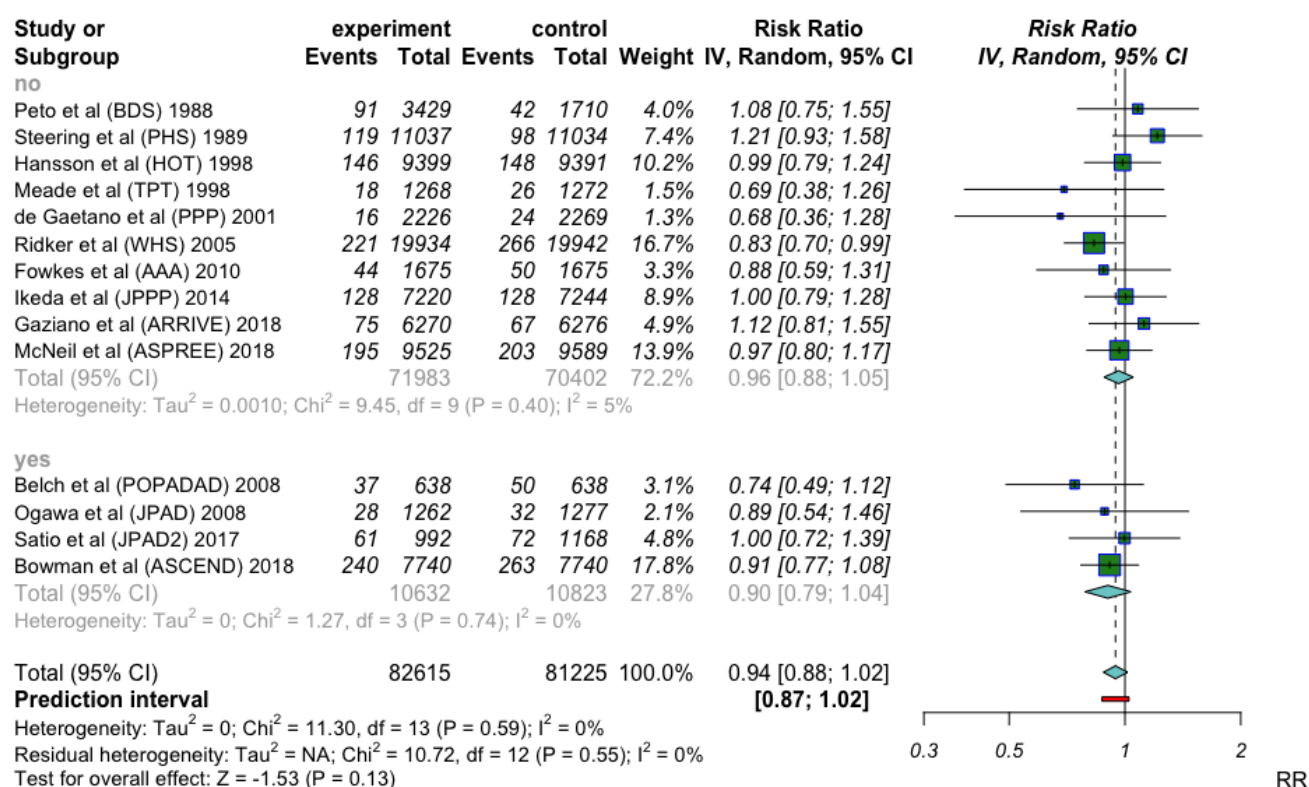

**Figure G.** Summary forest plot for sensitivity analysis on total stroke by placebo use (excluding placebo use trials)

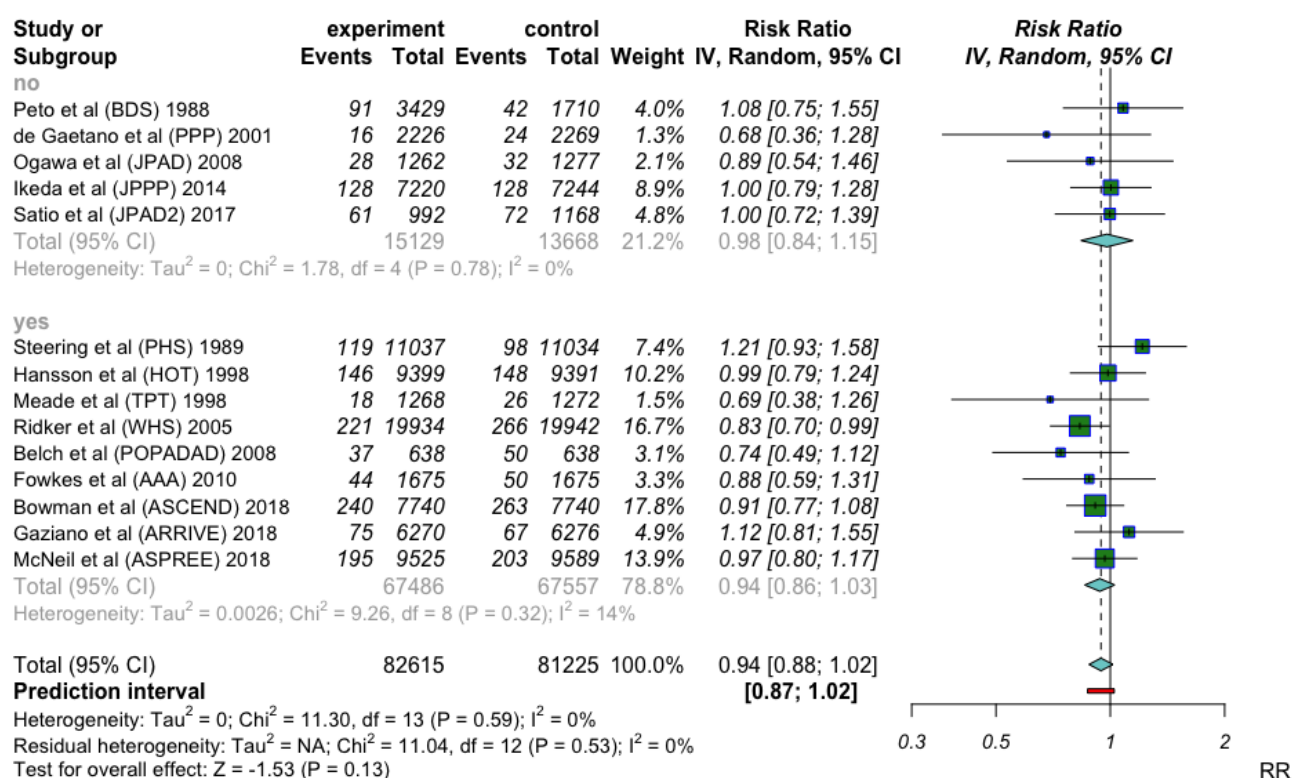



**Figure H.** Summary forest plot for sensitivity analysis on total stroke by excluding TPT trial

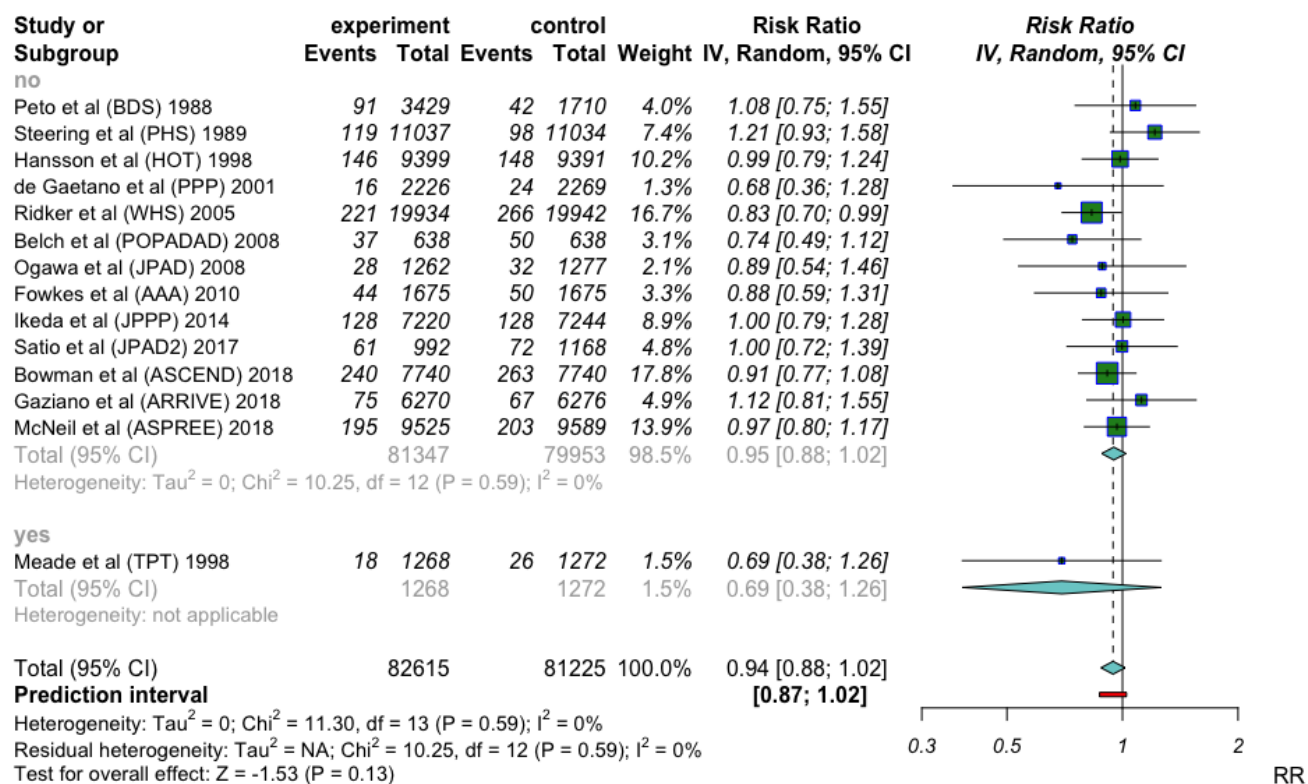

Supplement: Supplementary file [file 26063225]
